# Supplementary material
Source: Springer Nature journal article supplement (https://www.springermedizin.de/resource/supplementary/13030_2007_18_MOESM2_ESM.pdf/9644556)
Supplement: MOESM2 [file 9644556]

### Pre AT (before AT first trial)

### During AT of first trial

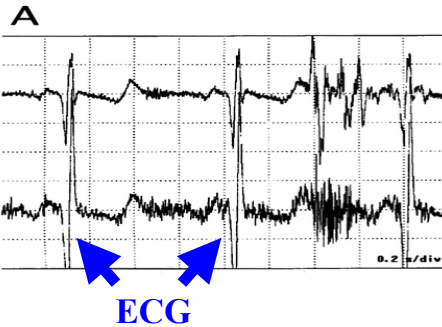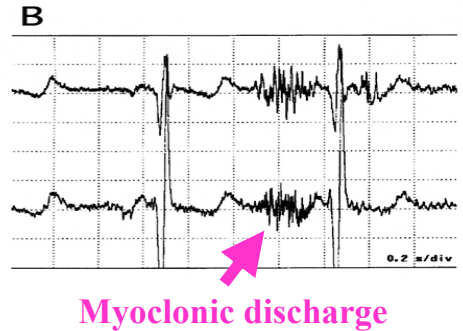

### Before AT of 16 days after starting

### During AT of 16 days after starting

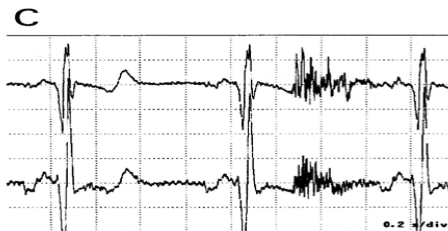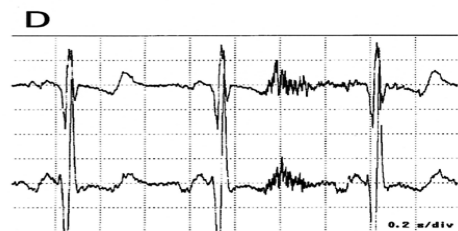

200  $\mu$ V

0.2 s/div
